# Supplementary material for: A facile one-step fabrication of a novel Cu/MoS2 nano-assembled structure for enhanced hydrogen evolution reaction performance
Source: Royal Society of Chemistry journal article supplement (doi:10.1039/c7ra01605k), 2017-01-01
Supplement: c7ra01605k1.pdf [file c7ra01605k1.pdf]

## Supplementary Information

### **A Facile One-Step Fabrication of a Novel Cu/MoS<sub>2</sub> Nano-Assembled Structure for Enhanced Hydrogen Evolution Reaction Performance**

Jiamu Cao<sup>a</sup>, Jing Zhou<sup>a</sup>, Yufeng Zhang<sup>a,b,\*</sup>, Xiaowei Liu<sup>a,b</sup>

<sup>a</sup>. MEMS Center, Harbin Institute of Technology, Harbin, China.

<sup>b</sup>. Key Laboratory of Micro-systems and Micro-structures Manufacturing, Ministry of Education, Harbin, China.

\*. Corresponding author: yufeng\_zhang@hit.edu.cn

### **Preparation of Cu/MoS<sub>2</sub> nano-assembled structure**

Sodium molybdate (242 mg), thiourea (286 mg), and CuCl<sub>2</sub>·2H<sub>2</sub>O (2.18 mg) were added to 60 ml of a mixture solution of isopropyl alcohol and ethylene glycol (EG) (v/v = 1:4) and sonicated for 30 min. A 1 M NaOH/EG solution was added to the mixture until a pH of 12 was reached, and then argon was blown into the mixture for 20 min. The mixture was microwaved for 120 s at a dynamic power of 1700 W by a microwave oven (Panasonic NE-1753) in a draught cupboard and then cooled naturally. Next, 1 M dilute nitric acid was added until a pH of 2 was reached. The product was collected by vacuum filtration and vacuum-dried at 60°C.

### **Preparation of MoS<sub>2</sub> nanosheets (MoS<sub>2</sub> NSs)**

A liquid exfoliation technique of ultrasound probe sonication was used to obtain MoS<sub>2</sub> NSs. This method is less susceptible to the surrounding environment, simple operation and suitable for large-scale production. To begin with, 1 g of powder of MoS<sub>2</sub> was dissolved in 100 mL N-Methylpyrrolidone (NMP), which was placed in a glass vial for a 3.5 h ultrasound, under the ultrasound power of 300 W, maintaining the temperature at 20 °C. Then, the mixture was transferred to centrifuge tubes for the first centrifugal, which was at the speed of 1500 rpm for 60 min and under the temperature at 10 °C. The top two-thirds of the supernatant liquid were reserved, and ethanol was added thereto to 300 ml for dilution. After that, the dilution was added into an ultrasonic processor, sonicated with an ultrasound probe for 10 min to obtain the up two-thirds of the solution, and then the solution was centrifuged at 2000 rpm for 60 min, the supernatant was small-sized MoS<sub>2</sub> NSs.

### **Preparation of Cu-modified MoS<sub>2</sub> nanosheets (Cu/MoS<sub>2</sub> NSs)**

MoS<sub>2</sub> NSs (20 mg), and CuCl<sub>2</sub>·2H<sub>2</sub>O (2.18 mg) were added to 60 ml of a mixture solution of isopropyl alcohol and ethylene glycol (EG) (v/v = 1:4) and sonicated for 30 min. A 1 M NaOH/EG solution was added to the mixture until a pH of 12 was reached, and then argon was blown into the mixture for 20 min. The mixture was microwaved for 120 s at a dynamic power of 1700 W by a microwave oven (Panasonic NE-1753) in a draught cupboard and then cooled naturally. Next, 1 M dilute nitric acid was added until a pH of 2 was reached. The product was collected by vacuum filtration and vacuum-dried at 60°C.

### **Material characterization and electrochemical evaluation**

The morphologies of the electrocatalysts were observed by transmission electron microscopy (TEM) using a microscope operated at an accelerating voltage of 300 keV. XPS was used to record the elemental composition and the electron binding energy using a K-Alpha instrument. The HER activity of electrocatalysts was examined using linear sweep voltammetry (LSV) with a scan rate of 5 mV s<sup>-1</sup> in 0.5 M H<sub>2</sub>SO<sub>4</sub>. The LSV was carried out using a CHI660D electrochemical workstation in a standard three-electrode setup with a saturated calomel electrode (SCE) as the reference electrode and a Pt foil as the counter electrode. Prior to the electrochemical measurements, the electrolyte was degassed by bubbling argon gas through it for 1 h; stable polarization curves were recorded after 20 cycles.

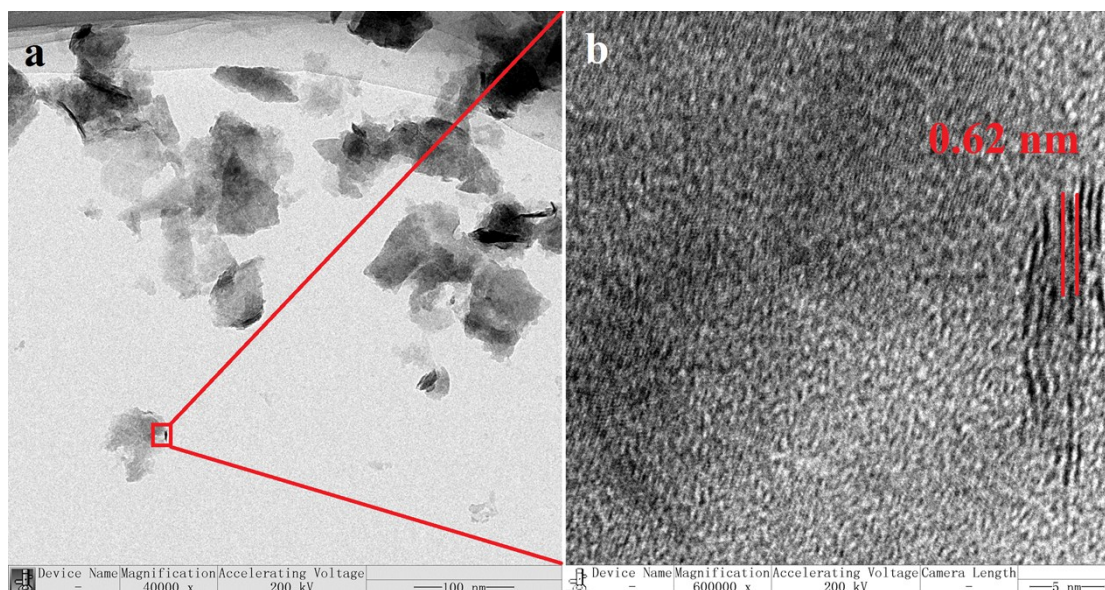

**Fig. S1** TEM image (a) and HRTEM image (b) of MoS<sub>2</sub> NSs. The images indicated that the active edges of the larger-sized MoS<sub>2</sub> NSs were finite.

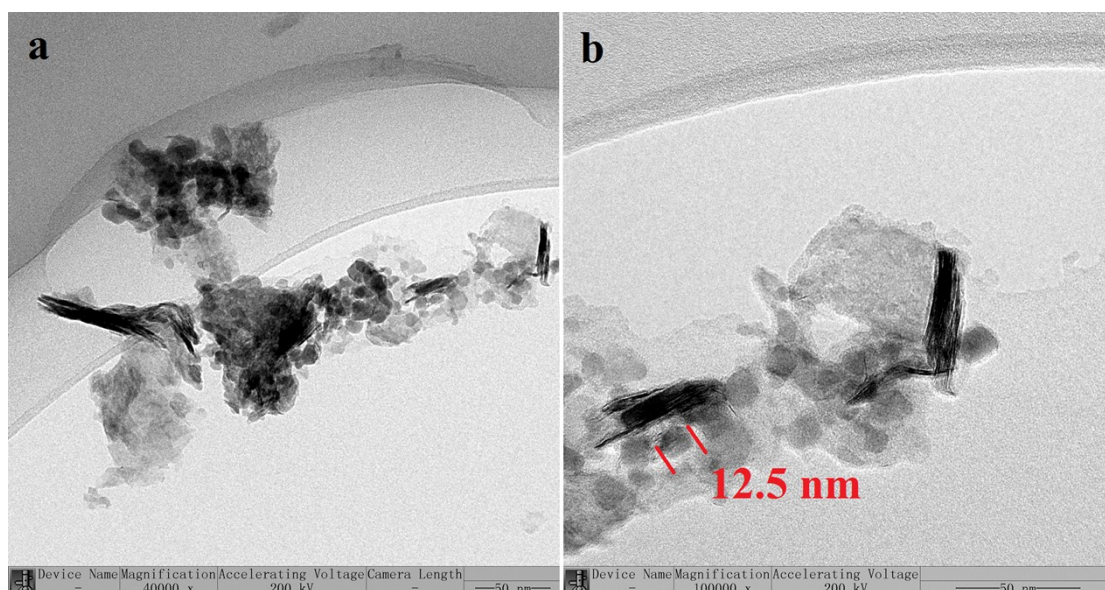

**Fig. S2** TEM image (a) and HRTEM image (b) of Cu/MoS<sub>2</sub> NSs nanohybrid. HRTEM indicated that having many highly crystalline Cu NPs covering the edges of the MoS<sub>2</sub> NSs may lead to the reduction of HER electrocatalytic performance.

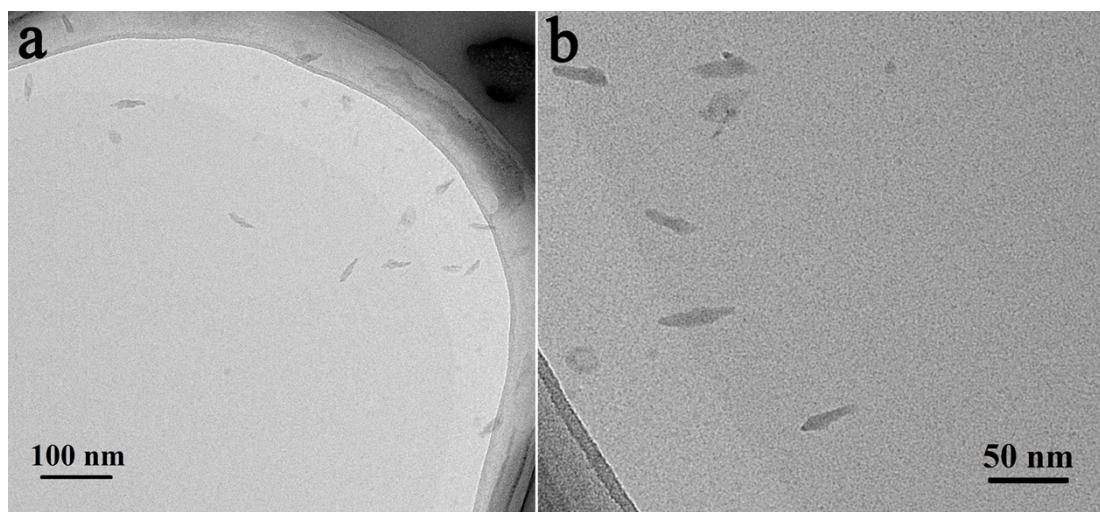

Fig. S3 TEM images of small-sized MoS<sub>2</sub> NSs.

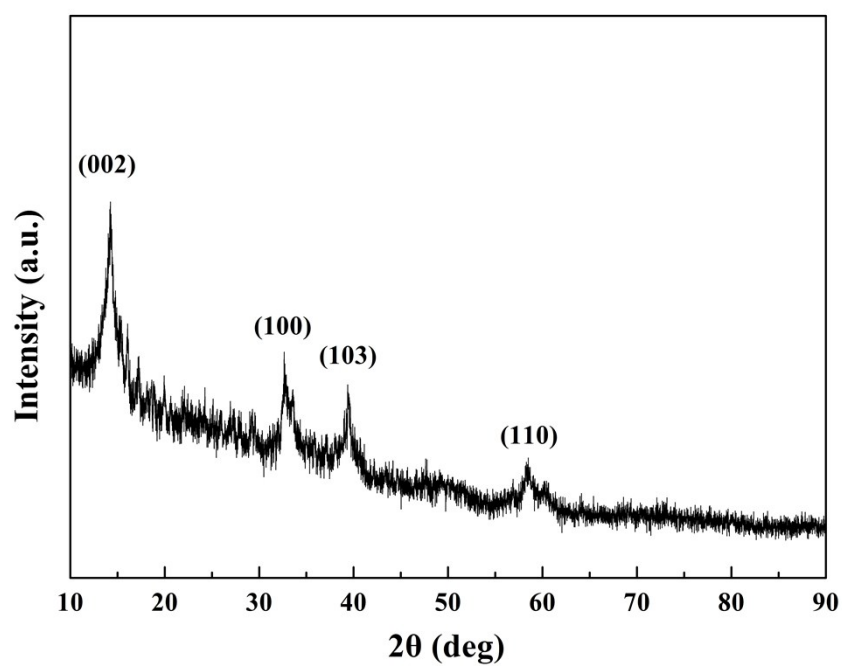

Fig. S4 XRD pattern of small-sized MoS<sub>2</sub> NSs.
